# Supplementary material for: Pathogenesis of Velogenic Genotype VII.1.1 Newcastle Disease Virus Isolated from Chicken in Egypt via Different Inoculation Routes: Molecular, Histopathological, and Immunohistochemical Study
Source: MDPI journal article supplement (doi:10.3390/ani11123567), 2021-12-15
Supplement: s1 [file s1]

---

## **Supporting Material**

---

# **Pathogenesis of Velogenic Genotype VII.1.1 Newcastle Disease Virus isolated from Chicken in Egypt Via Different Inoculation Routes: Molecular, Histopathological and Immunohistochemical Study**

Yassmin N. EL-Morshidy<sup>1</sup>, Walied Abdo<sup>2</sup>, Ehab Kotb Elmahallawy <sup>\*3</sup>, Ghada Allam Abd EL-Dayem<sup>4</sup>, Ahmed El sawak<sup>2</sup>, Nagwan El-Habashi<sup>2</sup>, Samah M. Mosad <sup>5</sup>, Maha S. Lokman <sup>6,7</sup>, Ashraf Albrakati <sup>8</sup> and Samah Abou Asa<sup>2</sup>

---

<sup>1</sup> Department of Veterinary Pathology, Animal Health Research Institute (AHRI), Agriculture Research Center (ARC), P.O. Box 246 Dokki, 12618 – Giza, Egypt; Dr.jessy.mail@gmail.com

<sup>2</sup> Department of Veterinary Pathology, Faculty of Veterinary Medicine, Kafrelsheikh University, 33516, Kafrelsheikh, Egypt; waliedsobhy40@gmail.com (W.A); elsawak1953@yahoo.com (A.E); nagwan\_hab@yahoo.com (N.E-H); ssabouasa@yahoo.com (S.A.A)

<sup>3</sup> Department of Zoonoses, Faculty of Veterinary Medicine, Sohag University, Sohag 82524, Egypt; eehaa@unileon.es

<sup>4</sup> Department of poultry diseases, Animal Health Research Institute (AHRI), Agriculture Research Center (ARC), P.O. Box 246 Dokki, 12618 – Giza, Egypt; anasesra@gmail.com

<sup>5</sup> Department of Virology, Faculty of Veterinary Medicine, Mansoura University, Mansoura 35516, Egypt; dr.sama786@yahoo.com

<sup>6</sup> Biology Department, College of Science and Humanities, Prince Sattam bin Abdul Aziz University, 11942, Alkharj, Saudi Arabia. 6; ms.hussein@psau.edu.sa

<sup>7</sup> Department of Zoology and Entomology, Faculty of Science, Helwan University, 11795 Cairo, Egypt. 7; ms.hussein@psau.edu.sa (M.S.L)

<sup>8</sup> Department of Human Anatomy, College of Medicine, Taif University, Taif 21944, P.O. Box 11099, Saudi Arabia; a.albrakati@tu.edu.sa

\* Correspondence: eehaa@unileon.es (E.K.E)

**Table S1.** Summary of clinical signs and gross lesions in chicken inoculated with CH-EGYPT-F42-DAKAHLIA-2019 strain via different routes routes.

| G                          |                 | Intraocular route (G1)                                                                                                                                                                                                                                                                                                                                                                                          | Choanal slit route (G2)                                                                                                                                                                                                                                                                                                                                                       | Intranasal route (G3)                                                                                                                                                                                                                                                                                                                                                                          | Mixed intranasal and intraocular route (G4)                                                                                                                                                                                                                                                                                                                                                                                 |
|----------------------------|-----------------|-----------------------------------------------------------------------------------------------------------------------------------------------------------------------------------------------------------------------------------------------------------------------------------------------------------------------------------------------------------------------------------------------------------------|-------------------------------------------------------------------------------------------------------------------------------------------------------------------------------------------------------------------------------------------------------------------------------------------------------------------------------------------------------------------------------|------------------------------------------------------------------------------------------------------------------------------------------------------------------------------------------------------------------------------------------------------------------------------------------------------------------------------------------------------------------------------------------------|-----------------------------------------------------------------------------------------------------------------------------------------------------------------------------------------------------------------------------------------------------------------------------------------------------------------------------------------------------------------------------------------------------------------------------|
| Day post infection (Dpi)/S | 2-4Dpi/S        | <ul style="list-style-type: none"> <li>Signs observed on 2 Dpi were slightly decreased food and water intake</li> <li>On 3-4 Dpi:</li> <li>Off food, ruffled feathers</li> <li>Closed eye , inflamed eyelid and watery eyes /+++ and Deviated head, +++</li> <li>lethargy and recumbence / and</li> <li>Greenish watery diarrhea /++</li> <li>Hoarse chirps (abnormal respiratory sound) /+</li> </ul>          | <ul style="list-style-type: none"> <li>Signs observed 2 Dpi were slightly decreased food and water intake</li> <li>On 3-4 Dpi:</li> <li>Off food, ruffled feathers</li> <li>watery eyes +</li> <li>lethargy and recumbence /++</li> <li>Deviated head/++</li> <li>Greenish watery diarrhea /+++</li> <li>Hoarse chirps /+++</li> </ul>                                        | <ul style="list-style-type: none"> <li>Signs observed on 2 Dpi were slightly decreased food and water intake</li> <li>On 3-4 Dpi: Off food, ruffled feathers</li> <li>Closed eye , inflamed eyelid and watery eyes /+</li> <li>Lethargy and recumbence /++</li> <li>Deviated head/+ and Hoarse chirps /+++</li> <li>Greenish watery diarrhea /++</li> </ul>                                    | <ul style="list-style-type: none"> <li>Signs observed 2 Dpi were slightly decreased food and water intake</li> <li>On 3-4 Dpi:</li> <li>Off food, ruffled feathers</li> <li>Closed and watery eyes /+++</li> <li>lethargy and recumbence /+++</li> <li>Deviated head/+++ and Hoarse chirps /++</li> <li>Greenish watery diarrhea /++</li> <li>2 birds died 3<sup>rd</sup> Dpi and 1 bird died 4<sup>th</sup> Dpi</li> </ul> |
|                            | 5-7Dpi/S        | <ul style="list-style-type: none"> <li>Signs progressed than 4<sup>th</sup> Dpi</li> <li>Nervous signs (deviated head and ataxia) /+++</li> <li>Mucoid nasal discharge ++</li> <li>Labored breathing /(+/++)</li> <li>2 bird died on 5<sup>th</sup> Dpi,</li> <li>4 birds died on 6<sup>th</sup> Dpi</li> <li>2 bird died on 7<sup>th</sup> Dpi</li> <li>3 birds were examined on 5<sup>th</sup> Dpi</li> </ul> | <ul style="list-style-type: none"> <li>Signs as observed on 4<sup>th</sup> Dpi</li> <li>Mucoid nasal discharge /(++)</li> <li>Nervous signs/(++)</li> <li>Labored breathing /+++</li> <li>3 bird died on 5<sup>th</sup> Dpi</li> <li>1 bird died on 6<sup>th</sup> Dpi</li> <li>2 bird died on 7<sup>th</sup> Dpi</li> <li>3birds were examined 5<sup>th</sup> Dpi</li> </ul> | <ul style="list-style-type: none"> <li>Signs severely progressed 4<sup>th</sup> Dpi</li> <li>Mucoid nasal discharge /(+++)</li> <li>nervous signs/+</li> <li>Labored breathing, grasping(+++)</li> <li>3 birds died on 5<sup>th</sup> Dpi</li> <li>4 birds died on 6<sup>th</sup> Dpi</li> <li>3 birds died on 7<sup>th</sup> Dpi</li> <li>3 birds were examined 5<sup>th</sup> Dpi</li> </ul> | <ul style="list-style-type: none"> <li>Signs progressed than 4<sup>th</sup> Dpi</li> <li>Mucoid nasal discharge /(+/+++)</li> <li>nervous signs/ +++</li> <li>labored breathing /+++</li> <li>3 birds died on 6<sup>th</sup> Dpi</li> <li>3 bird died on 7<sup>th</sup> Dpi</li> <li>3 birds were examined 5<sup>th</sup> Dpi</li> </ul>                                                                                    |
|                            | 8 up to 10Dpi/S | <ul style="list-style-type: none"> <li>As signs observed on 7<sup>th</sup> Dpi</li> <li>No mortalities</li> <li>3 birds were examined on 10<sup>th</sup> Dpi</li> </ul>                                                                                                                                                                                                                                         | <ul style="list-style-type: none"> <li>Same signs observed 7<sup>th</sup> Dpi</li> <li>No mortalities</li> <li>3 birds were examined 10<sup>th</sup> Dpi</li> </ul>                                                                                                                                                                                                           | <ul style="list-style-type: none"> <li>As signs observed on 7<sup>th</sup> Dpi</li> <li>1 bird died on 10<sup>th</sup> Dpi</li> <li>3 birds were examined 10<sup>th</sup> Dpi</li> </ul>                                                                                                                                                                                                       | <ul style="list-style-type: none"> <li>As signs observed on 7<sup>th</sup> Dpi</li> <li>3 birds were examined on 10<sup>th</sup> Dpi</li> </ul>                                                                                                                                                                                                                                                                             |
| Mortality                  |                 | 40%                                                                                                                                                                                                                                                                                                                                                                                                             | 30%                                                                                                                                                                                                                                                                                                                                                                           | 55%                                                                                                                                                                                                                                                                                                                                                                                            | 45%                                                                                                                                                                                                                                                                                                                                                                                                                         |

**Table S2.** Summary of gross lesions in chicken inoculated with NDV CH-EGYPT-F42-DAKAHLIA-2019 strain via different routes.

| G             | Intraocular route (G1)                                                                                                                                                                                                                                                                                                                                                                                                                                                                                                                                                                                                                                                                                                                                                                                                                                                                                                                                                                                  | Choanal slit route (G2)                                                                                                                                                                                                                                                                                                                                                                                                                                                                                                                                                                                                                                                                                                                                                                          | Intranasal route (G3)                                                                                                                                                                                                                                                                                                                                                                                                                                                                                                                                                                                                                                                                                                                                                                                                                                                                                                                                                                                                                              | Mixed intranasal and intraocular (G4)                                                                                                                                                                                                                                                                                                                                                                                                                                                                                                                                                                                                                                                                                                                                                                                                                                                                                                                                                                                                                                |
|---------------|---------------------------------------------------------------------------------------------------------------------------------------------------------------------------------------------------------------------------------------------------------------------------------------------------------------------------------------------------------------------------------------------------------------------------------------------------------------------------------------------------------------------------------------------------------------------------------------------------------------------------------------------------------------------------------------------------------------------------------------------------------------------------------------------------------------------------------------------------------------------------------------------------------------------------------------------------------------------------------------------------------|--------------------------------------------------------------------------------------------------------------------------------------------------------------------------------------------------------------------------------------------------------------------------------------------------------------------------------------------------------------------------------------------------------------------------------------------------------------------------------------------------------------------------------------------------------------------------------------------------------------------------------------------------------------------------------------------------------------------------------------------------------------------------------------------------|----------------------------------------------------------------------------------------------------------------------------------------------------------------------------------------------------------------------------------------------------------------------------------------------------------------------------------------------------------------------------------------------------------------------------------------------------------------------------------------------------------------------------------------------------------------------------------------------------------------------------------------------------------------------------------------------------------------------------------------------------------------------------------------------------------------------------------------------------------------------------------------------------------------------------------------------------------------------------------------------------------------------------------------------------|----------------------------------------------------------------------------------------------------------------------------------------------------------------------------------------------------------------------------------------------------------------------------------------------------------------------------------------------------------------------------------------------------------------------------------------------------------------------------------------------------------------------------------------------------------------------------------------------------------------------------------------------------------------------------------------------------------------------------------------------------------------------------------------------------------------------------------------------------------------------------------------------------------------------------------------------------------------------------------------------------------------------------------------------------------------------|
| Gross lesions | <ul style="list-style-type: none"> <li>• Mucoïd discharges in nostrils &amp;oral cavity/+</li> <li>• Hemorrhage w congestion in proventriculus, gizzard and intestine /+++</li> <li>• Congestion and hemorrhages of liver (5<sup>th</sup> Dpi)/++to+++</li> <li>• brain congestion (5<sup>th</sup> Dpi)/+++</li> <li>• fibrinous pericarditis, thickened air sac (5Dpi)/+</li> <li>• Congested or hemorrhagic kidney (5<sup>th</sup> Dpi)/++</li> <li>• Hemorrhage w congestion in thymus (5<sup>th</sup> Dp)i/++</li> <li>• watery eyes with inflamed eye lid</li> <li>• atrophied hemorrhagic cecal tonsils (5<sup>th</sup> Dpi)</li> <li>• Hemorrhage w congestion in lung (7<sup>th</sup> Dpi) / ++to+++</li> <li>• atrophied spleen or w few white spots foci in spleen, 5<sup>th</sup> and 7<sup>th</sup>Dp i</li> <li>• Hemorrhage w congestion in lung/ 7<sup>th</sup> Dpi +++</li> <li>• Hemorrhages myocardial5<sup>th</sup> Dpi/++</li> <li>• necrotic areas on liver tips(10Dpi)</li> </ul> | <ul style="list-style-type: none"> <li>• Mucoïd discharges in nostrils &amp;oral cavity/++</li> <li>• Hemorrhage w congestion in proventriculus, gizzard and intestine / - to+</li> <li>• fibrinous pericarditis(5Dpi), thickened air sac /+ to++</li> <li>• Hemorrhage w congestion in lung5<sup>th</sup> Dpi / +to++</li> <li>• Hemorrhage w congestion in thymus 5<sup>th</sup> Dpi /+</li> <li>• atrophied cecal tonsils may w small hemorrhages (5<sup>th</sup> Dpi)</li> <li>• Congestion and hemorrhages of liver (7<sup>th</sup> Dpi)/++</li> <li>• brain congestion (5<sup>th</sup> Dpi)/+to++</li> <li>• one white spots foci in spleen5<sup>th</sup> and atrophied spleen 7<sup>th</sup> Dpi</li> <li>• Congested or hemorrhagic kidney (7Dpi), friable pale kidney(10Dpi)</li> </ul> | <ul style="list-style-type: none"> <li>• Mucoïd discharges in nostrils &amp;oral cavity/+++</li> <li>• Hemorrhage w congestion in proventriculus, gizzard and intestine/ +++</li> <li>• Necrotic areas in small intestine (5<sup>th</sup> Dpi)</li> <li>• Congestion and hemorrhages of liver (5<sup>th</sup> Dpi) /+++</li> <li>• brain congestion (5<sup>th</sup> Dpi)/(- to+)</li> <li>• fibrinous pericarditis(5Dpi) , thickened air sac /+++</li> <li>• Hemorrhage w congestion in lung(5<sup>th</sup> Dpi) / +to++</li> <li>• Congested or hemorrhagic kidney / 5<sup>th</sup> Dpi ++to+++</li> <li>• Hemorrhage w congestion in thymus (5<sup>th</sup> Dpi)/ ++</li> <li>• Hemorrhage w congestion in lung (5<sup>th</sup> Dpi)/+++</li> <li>• Congestion of liver , brain congestion / ++</li> <li>• atrophied hemorrhagic cecal tonsils (5<sup>th</sup> Dpi)</li> <li>• Hemorrhages myocardial (5<sup>th</sup> Dpi) /++ to+++</li> <li>• atrophied spleen or w few white spots foci in spleen5<sup>th</sup> Dpi-7<sup>th</sup></li> </ul> | <ul style="list-style-type: none"> <li>• Mucoïd discharges in nostrils &amp;oral cavity/++to+++</li> <li>• Hemorrhage w congestion in proventriculus, gizzard and intestine /++ to +++</li> <li>• Hemorrhage or congestion of liver(5<sup>th</sup> Dpi) /+++</li> <li>• brain congestion (5<sup>th</sup> Dpi)/ +++</li> <li>• atrophied spleen or w few White spots on spleen 5<sup>th</sup> Dpi-7<sup>th</sup></li> <li>• watery eyes with inflamed eye lid</li> <li>• fibrinous pericarditis(5<sup>th</sup> Dpi), thickened air sac /+++</li> <li>• Congested or hemorrhagic kidney (5<sup>th</sup> Dpi) / + ++</li> <li>• Hemorrhage w congestion in thymus (5<sup>th</sup> Dpi)/+++</li> <li>• Hemorrhage w congestion in lung/ (5<sup>th</sup> Dpi)/ +++</li> <li>• Enlarged pale kidney (7<sup>th</sup> Dpi)</li> <li>• atrophied hemorrhagic cecal tonsils (5<sup>th</sup> Dpi)</li> <li>• Hemorrhages on duodenum</li> <li>• Hemorrhages on myocardium (5<sup>th</sup> Dpi)/+++</li> <li>• Necrotic areas in small intestine (7<sup>th</sup> Dpi)</li> </ul> |

Dpi=day post infection; w= with; /S=Score or degree of lesions; (+= mild; ++= moderate; +++= severe)
